# Supplementary material for: Synthesis, characterization and antimicrobial activity of ZnO-QDs @ bis MPA polyester-64-hydroxyl dendrimer nanostructures
Source: Royal Society of Chemistry journal article supplement (doi:10.1039/d4su00116h), 2024-01-01
Supplement: d4su00116h1.pdf [file d4su00116h1.pdf]

**Instrumental parameters for X ray diffraction of ZnO QDs:**

(Model: Bruker AXS D8 Focus P-XRD)

|                                     |              |
|-------------------------------------|--------------|
| Starting position [2 $\Theta$ ]:    | 10°          |
| End position [2 $\Theta$ ]:         | 80°          |
| Step Size[2 $\Theta$ ]:             | 0.04°        |
| Scan Step Time:                     | 14.3 s       |
| Scan Type:                          | Continuous   |
| PSD Mode:                           | Scanning     |
| PSD Actual Two Theta [2 $\Theta$ ]: | 8.5421°      |
| Offset [2 $\Theta$ ]:               | 0.0000°      |
| Measurement Temperature:            | 25 °C        |
| Anode material:                     | Cu           |
| K- $\alpha$ 1:                      | 1.5406       |
| K- $\alpha$ 2:                      | 1.54439      |
| K- $\alpha$ Average:                | 1.54184      |
| K- $\alpha$ Ratio:                  | 0.5          |
| Generator setting:                  | 40 mA, 40 kV |
| Goniometer Radius:                  | 260 mm       |
| Spinning:                           | Yes          |
| AntiScattering Slit:                | 7.1          |
| Detector Slit:                      | 10.5         |
| Divergence Slit:                    | 0.6          |
| Primary Soller Slit:                | 2.5          |
| Second Soller Slit:                 | 2.5          |
| Slit Changer In:                    | 9999         |
| Divergence slit Type:               | 0.6          |
| Detector Slit:                      | 10.5         |
| AntiScattering Slit:                | 7.1          |
| Beta:                               | 1.39222      |
| Detector Slit:                      | 10.5         |
| Divergence Slit:                    | 0.6          |

| No.                            | d Spacing (Å) | Diffraction Angle (degrees) | Relative Intensity (%) | FWHM | Size (nm) |
|--------------------------------|---------------|-----------------------------|------------------------|------|-----------|
| 1                              | 3.16          | 28.13                       | 13.05                  | 1.02 | 7.55      |
| 2                              | 2.98          | 29.87                       | 37.96                  | 0.71 | 10.81     |
| 3                              | 2.54          | 35.21                       | 100                    | 0.72 | 10.51     |
| 4                              | 2.23          | 40.32                       | 23.21                  | 1.09 | 6.84      |
| 5                              | 2.11          | 42.9                        | 28.15                  | 1.14 | 6.48      |
| 6                              | 1.71          | 53.54                       | 34.20                  | 1.19 | 5.96      |
| 7                              | 1.61          | 56.92                       | 45.90                  | 0.69 | 10.12     |
| 8                              | 1.48          | 62.54                       | 57.95                  | 0.69 | 9.84      |
| 9                              | 1.27          | 74.31                       | 24.36                  | 1.12 | 5.65      |
| Average Crystallite Size = 8nm |               |                             |                        |      |           |
| Standard deviation= 2          |               |                             |                        |      |           |

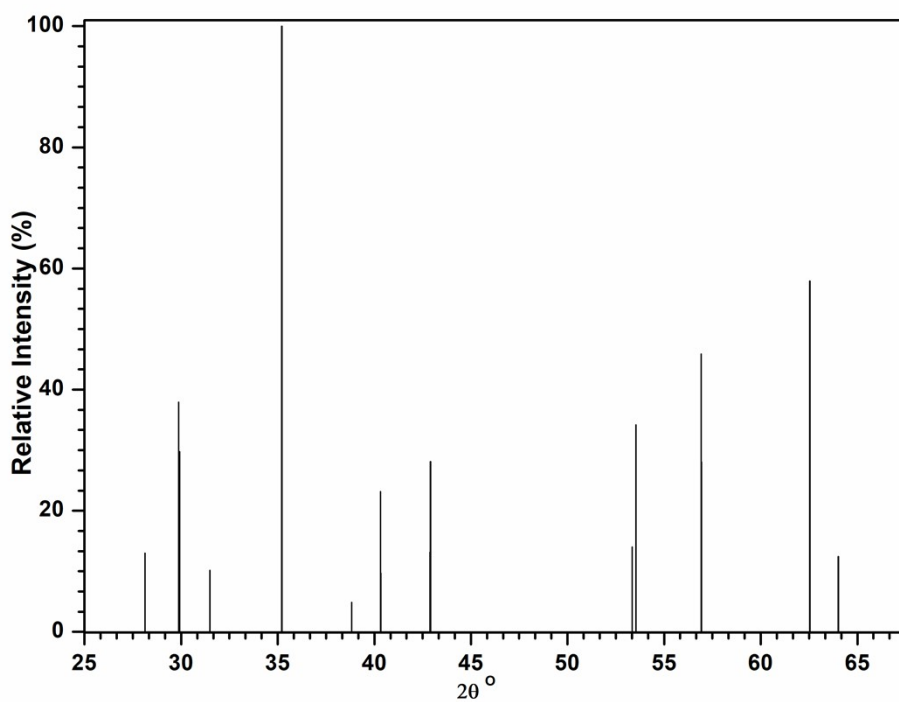

Figure 1 X ray diffraction relative intensity of ZnO QDs
